# Supplementary material
Source: PubMed Central journal article supplement (PMC4773904)
Supplement: NIHMS763011-supplement-Supplement1.pdf [file NIHMS763011-supplement-Supplement1.pdf]

## Supplementary Appendix

This appendix has been provided by the authors to give readers additional information about their work.

Supplement to: Shaw AT, Friboulet L, Leshchiner I, et al. Resensitization to crizotinib by the lorlatinib *ALK* resistance mutation L1198F. *N Engl J Med* 2016;374:54-61. DOI: 10.1056/NEJMoa1508887

## SUPPLEMENTARY APPENDIX

Supplement to: Shaw et al. Resistance to the Next Generation ALK Inhibitor Lorlatinib Restores Sensitivity to Crizotinib

| <b>Contents</b>                                                                                           | <b>Page</b> |
|-----------------------------------------------------------------------------------------------------------|-------------|
| Supplementary Methods                                                                                     | 2           |
| Figure S1. Identification of ALK C1156Y/L1198F by Sanger Sequencing                                       | 7           |
| Figure S2. Phylogenetic Relationship of Pre-Treatment and Resistant Samples                               | 8           |
| Figure S3. Suppression of ALK C1156Y/L1198F Phosphorylation by Crizotinib                                 | 9           |
| Figure S4. Resensitization of Crizotinib-Resistant ALK Mutants by L1198F                                  | 10          |
| Figure S5. Co-crystal Structures of ALK C1156Y with Crizotinib                                            | 11          |
| Figure S6. Co-crystal Structures of ALK C1156Y and C1156Y/L1198F with Crizotinib or Lorlatinib            | 12          |
| Table S1. Cell Survival Assays in Ba/F3 Models of ALK Resistance                                          | 13          |
| Table S2. Cell Survival Assays in Ba/F3 Models Expressing Different ALK L1198F Mutants                    | 14          |
| Table S3. Inhibition Constants of ALK Inhibitors with Wildtype and Mutant ALK Kinase Domains              | 15          |
| Table S4. Kinetic Parameters of Wildtype and Mutant ALK Kinase Domains                                    | 16          |
| Table S5. Computational Models Comparing Wildtype ALK and ALK L1198F Binding to Crizotinib and Lorlatinib | 17          |
| Table S6. Energetics of Crizotinib and Lorlatinib Binding to Wildtype and Mutant ALK Kinase Domains       | 18          |
| References                                                                                                | 19          |

## SUPPLEMENTARY METHODS

### *Isolation and Sequencing of Nucleic Acid*

For snapshot-NGS analysis (v1.1.4), genomic DNA was isolated from formalin-fixed paraffin embedded (FFPE) tumor specimens. The DNA was sheared with the Covaris M220 instrument, followed by end repair, adenylation, and ligation with an adapter. A sequencing library targeting hotspots and exons in 39 genes was generated using two hemi-nested PCR reactions. Illumina MiSeq 2 x 151 base paired-end sequencing results were aligned to the hg19 human genome reference using BWA-MEM<sup>1</sup>. MuTect<sup>2</sup> and a laboratory-developed insertion/deletion analysis algorithm were used for SNV and indel variant detection, respectively. This assay can detect SNV and indel variants at  $\geq 5\%$  allelic frequency in target regions with sufficient read coverage.

For Sanger sequencing of cDNA, RNA was isolated from flash frozen tumor specimens and cDNA was generated. EML4-ALK was amplified using primers 1F (TCCAGAAAGCAAGAATGCTACTCC) and 4193R (ggcaaagcgggtgttgattacatcc). The entire ALK kinase domain was sequenced using the primers 3221F (agagccctgagtacaagctgag) and 4193R.

For whole exome sequencing, genomic DNA was extracted from FFPE tumor samples. Whole-exome capture libraries were constructed from 100ng of extracted tumor and normal DNA following shearing, end repair, phosphorylation and ligation to barcoded sequencing adapters<sup>3,4</sup>. Ligated DNA was size-selected for lengths between 200-350bp and subjected to exonic hybrid capture using SureSelect v2 Exome bait (Agilent). Samples were multiplexed and sequenced on multiple Illumina HiSeq flowcells (paired end 76bp reads) to average depth of coverage of 116-185x and 125x for tumor and normals, respectively.

### *Analysis of Whole Exome Sequencing*

Massively parallel sequencing data were processed using two consecutive pipelines: (1) The sequencing data processing pipeline, called “Picard”, developed by the Sequencing Platform at the Broad Institute, starts with the reads and qualities produced by the Illumina software for all lanes and libraries generated for a single sample (either tumor or normal) and produces, at the end of the pipeline, a single BAM file (<http://samtools.sourceforge.net/SAM1.pdf>) representing the sample. (2) The Broad Cancer Genome Analysis pipeline, also known as “Firehose” ([www.broadinstitute.org/cancer/cga/Firehose](http://www.broadinstitute.org/cancer/cga/Firehose)), starts with the BAM files for each sample and matched normal sample from peripheral blood (hg19), and performs various analyses, including quality control, local realignment, mutation calling, small insertion and deletion identification, rearrangement detection, coverage calculations and others. The details of our sequencing data processing have been described elsewhere<sup>5,6</sup> (see [www.broadinstitute.org/cancer/cga](http://www.broadinstitute.org/cancer/cga)).

Somatic single-nucleotide variations (SSNVs) were detected using MuTect<sup>2</sup>. Single nucleotide variants found within coding areas of the genome were annotated for the chromosomal location, the type of the variant, the codon change and the change in the protein sequence using Oncotator<sup>7</sup>. Insertions and deletions in coding areas (both frameshift and in-frame) were detected using the algorithm Indelocator ([www.broadinstitute.org/cancer/cga/Indelocator](http://www.broadinstitute.org/cancer/cga/Indelocator)).

We used the ABSOLUTE algorithm to calculate the purity, ploidy, and absolute DNA copy-numbers of each sample<sup>8</sup>. Following the framework previously described<sup>8</sup>, we computed the posterior probability distribution over CCF. Further details of this procedure were described recently<sup>9</sup>.

### *Clustering analysis of SSNVs*

We employed a previously described Bayesian clustering procedure<sup>10</sup>. The details of this procedure have been recently described<sup>9,11</sup>. This approach exploits the assumption that the observed subclonal SSNV CCF values were sampled from a smaller number of subclonal cell

populations (subclones). All remaining uncertainty (including the exact number of clusters) was integrated out using a mixture of Dirichlet processes, which was fit using a Gibbs sampling approach, building on a previously described framework<sup>10</sup>.

### *Ba/F3 Cell Line Studies*

Ba/F3 cells were engineered to express *EML4-ALK* harboring different ALK resistance mutations as previously described<sup>12</sup>. Cells were seeded in triplicate into 96-well plates and cultured overnight. Serial dilutions of different ALK inhibitors were added to the wells, and cells were incubated for 48 hours. Cell viability was determined using Cell Titer Glo (Promega). IC50 values were calculated by concentration-response curve fitting utilizing a four-parameter analytical method. Crizotinib, ceritinib, and brigatinib were purchased from Selleckchem. Alectinib was purchased from Active Biochem. Lorlatinib was provided by Pfizer.

### *Binding Affinities and Enzyme Kinetics*

Recombinant human wildtype and mutant ALK kinase domain proteins (amino acids 1093-1411) were produced in house using baculoviral expression and pre-activated by autophosphorylation of 10-100  $\mu$ M enzyme in 100 mM HEPES, pH 7.1, 20 mM  $MgCl_2$ , 4 mM ATP for 1-4 hours at room temperature to achieve maximal activity. ALK  $K_i$  inhibition constants were determined by a microfluidic mobility shift assay using 11 doses of 3-fold serially diluted inhibitors (0-1  $\mu$ M) at 4 concentrations of ATP (0.25-2 mM) and global fitting initial reaction velocities to a Morrison equation for competitive inhibition as previously described<sup>13,14</sup>. The reactions contained 1, 0.2, 2.5 or 0.4 nM of wildtype, C1156Y, L1198F or C1156Y/L1198F mutant ALK enzyme, respectively. Kinetic parameters were determined by a coupled spectrophotometric ATP-regenerating assay as previously reported<sup>15</sup> using a “YFF” ALK activation loop peptide

(ARDIYRASFFRKGGCAML PVK) as a phosphoacceptor substrate, which was reported to be phosphorylated more rapidly than the wild-type “YYY” peptide<sup>16</sup>. The reactions contained 10, 2.5, 25, or 5 nM of wildtype, C1156Y, L1198F or C1156Y/L1198F mutant ALK enzyme, respectively, and 7.8-500  $\mu$ M YFF peptide and 1 mM ATP to generate  $K_{M,YFF}$  or 7.8-1000  $\mu$ M ATP and 1 mM YFF peptide to generate  $K_{M,ATP}$ . Reactions were started by adding ATP and conducted at 30 °C. Initial reaction velocities were fit to a Michaelis-Menten equation using GraphPad Prism (GraphPad Software, San Diego, CA) to determine the turnover number,  $k_{cat}$ , and Michaelis constants,  $K_M$ , for ATP and YFF substrate.

### *Co-crystal Structures*

The mutant ALK co-crystal structures with crizotinib or lorlatinib described here have been deposited to the Protein Data Bank (wwPDB) and the details of the methods used can be found under accession codes: 5A9U (C1156Y ALK+lorlatinib, 1.6 Å), 5AA8 (C1156Y/L1198F ALK+lorlatinib, 1.86 Å), 5AA9 (L1198F ALK+lorlatinib, 1.77 Å), 5AAA (L1198F ALK+crizotinib, 1.73 Å), 5AAB (C11156Y/L1198F ALK+crizotinib, 2.2 Å), and 5AAC (C1156Y ALK+crizotinib, 1.70 Å). Non-phosphorylated human mutant ALK kinase domain proteins (amino acids 1093-1411) were crystallized by the hanging drop vapor diffusion method at 13 °C by mixing 2  $\mu$ L of purified protein solution (11-15 mg/mL) containing crizotinib or lorlatinib at a 2x stoichiometric ratio to protein with 2  $\mu$ L of solutions containing 0.2 M lithium sulfate, 17-21% PEG MW=3350, and 0.1 M Tris pH range 7.6-8.5.

### *Isothermal Titration Calorimetry (ITC)*

Binding experiments were carried out on a VP ITC instrument (Malvern Instruments) at 20 °C. Compound binding to nonphosphorylated ALK kinase domain proteins was measured in 150 mM NaCl, 25 mM HEPES, pH 7.5, 5 mM MgCl<sub>2</sub>, 10% glycerol, 1 mM TCEP and 1% DMSO.

Data was analyzed using the ORIGIN software by 1:1 binding model except for lorlatinib which was analyzed using a displacement binding approach to extend the detection limit of the technique. Standard deviation was calculated from triplicate experiments.

### *Computational Binding Studies*

Free-energy perturbation with replica exchange with solute tempering (FEP/REST; Schrodinger 2015-2; Desmond: FEP Protein Mutation for Ligand Selectivity; default settings; OPLS2.1 FF models). Protein Models: PDB 2XP2 crizotinib bound to ALK kinase domain protein. All missing loops were modeled using PRIME. Ligand Models: Published co-crystal structures were aligned to crizotinib-ALK co-crystal structure.

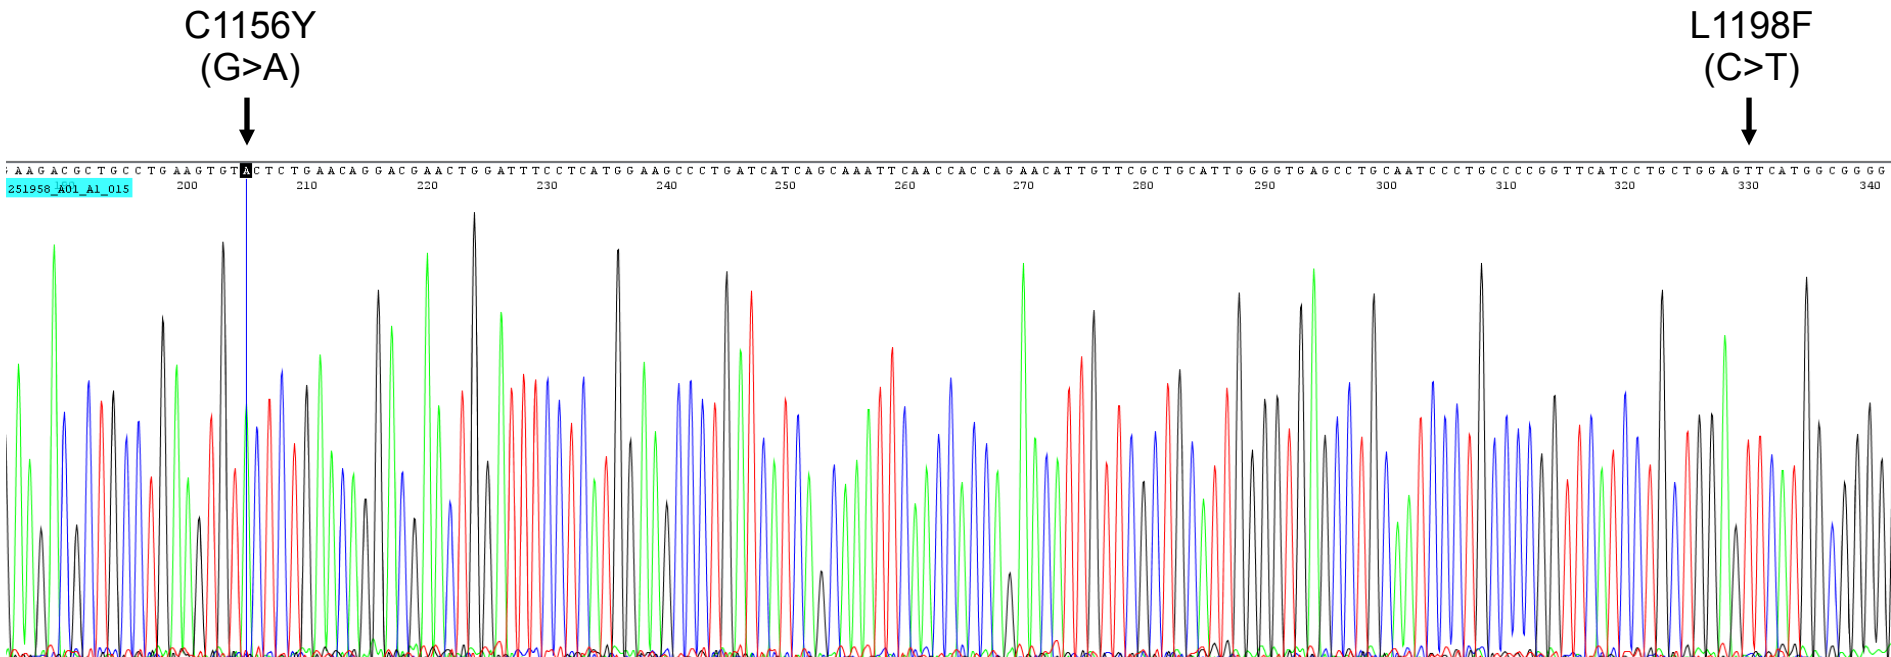

### Figure S1. Identification of ALK C1156Y/L1198F by Sanger Sequencing

EML4-ALK was amplified from cDNA as described in the text. PCR products were subcloned into the pCR4-TOPO vector, and individual bacterial colonies were sequenced. Shown is a representative chromatogram demonstrating the presence of both ALK C1156Y and L1198F mutations in a single bacterial clone.



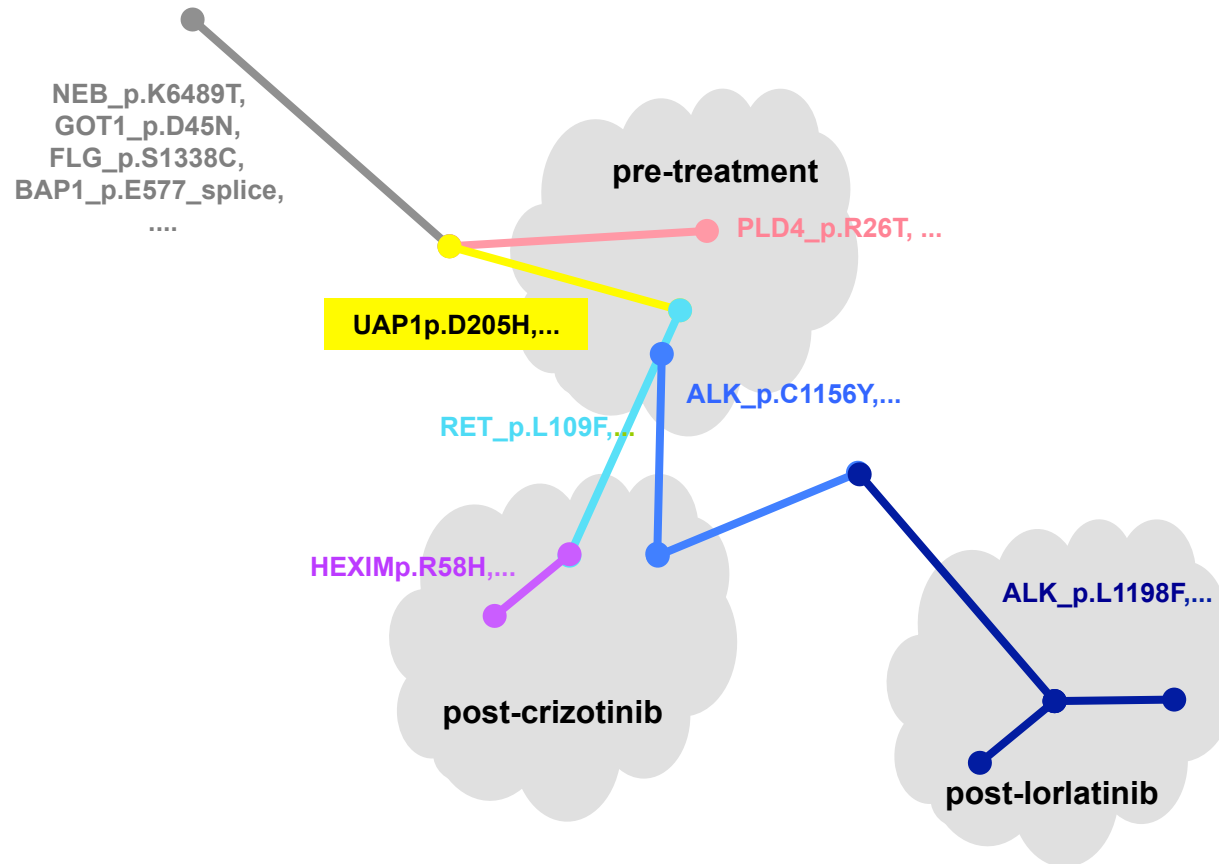

**Figure S2. Phylogenetic Relationship of Pre-Treatment and Resistant Samples**

This branched diagram or “tree” depicts the clonal evolution of the patient’s lung cancer as she became resistant to crizotinib and lorlatinib. Multiple subclones were present in each biopsy, with only the major subclones shown here. The colors of individual subclones correspond to those shown in Figure 1E. Whole exome sequencing and clustering analysis are described in Supplementary Methods.

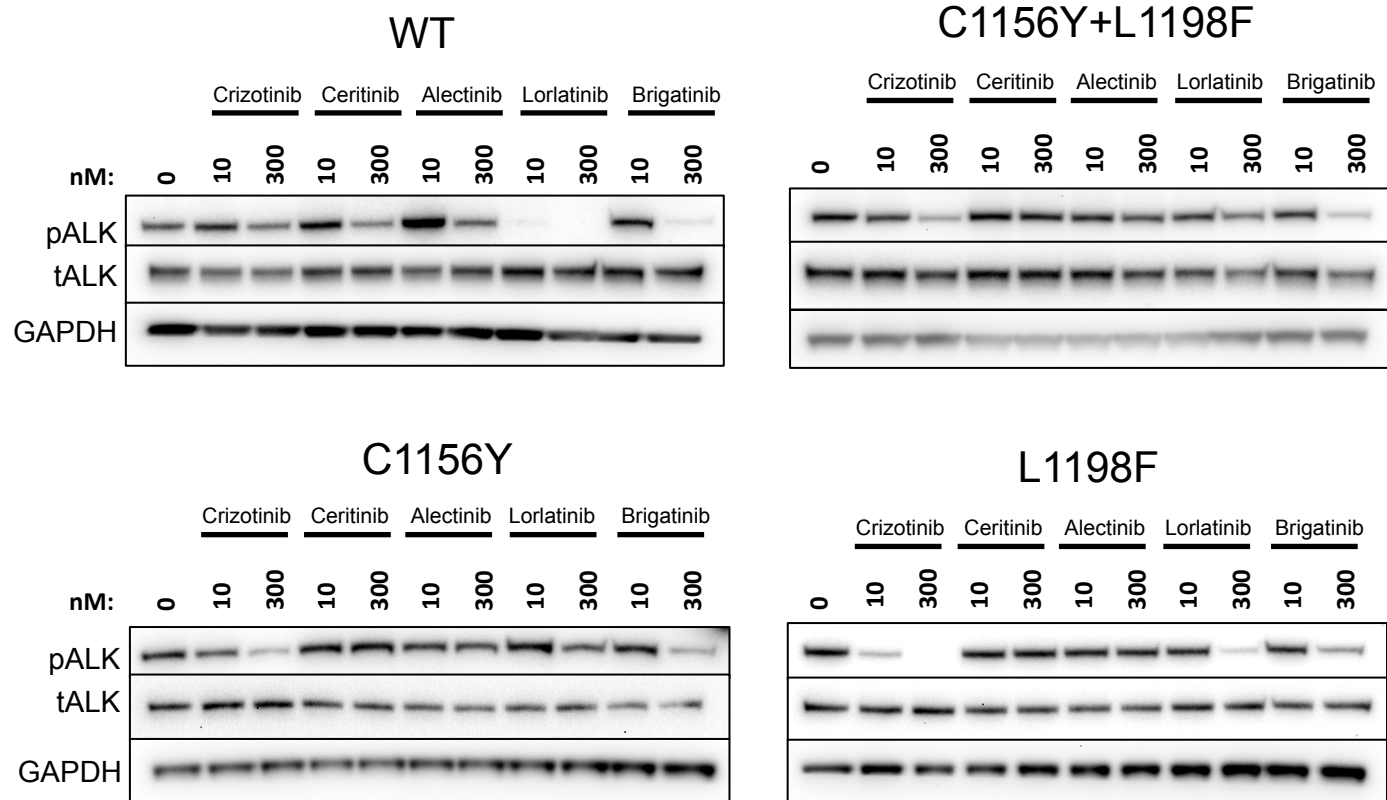

**Figure S3. Suppression of ALK C1156Y/L1198F Phosphorylation by Crizotinib**  
 Ba/F3 cells transformed by wildtype or mutant EML4-ALK were treated with the indicated ALK inhibitors for 3 hours. Cell lysates were probed with phospho-ALK (Y1282/1283) and ALK-specific antibodies (Cell Signaling Technology), as well as GAPDH antibody (Millipore). pALK, phosphoALK; tALK, total ALK.

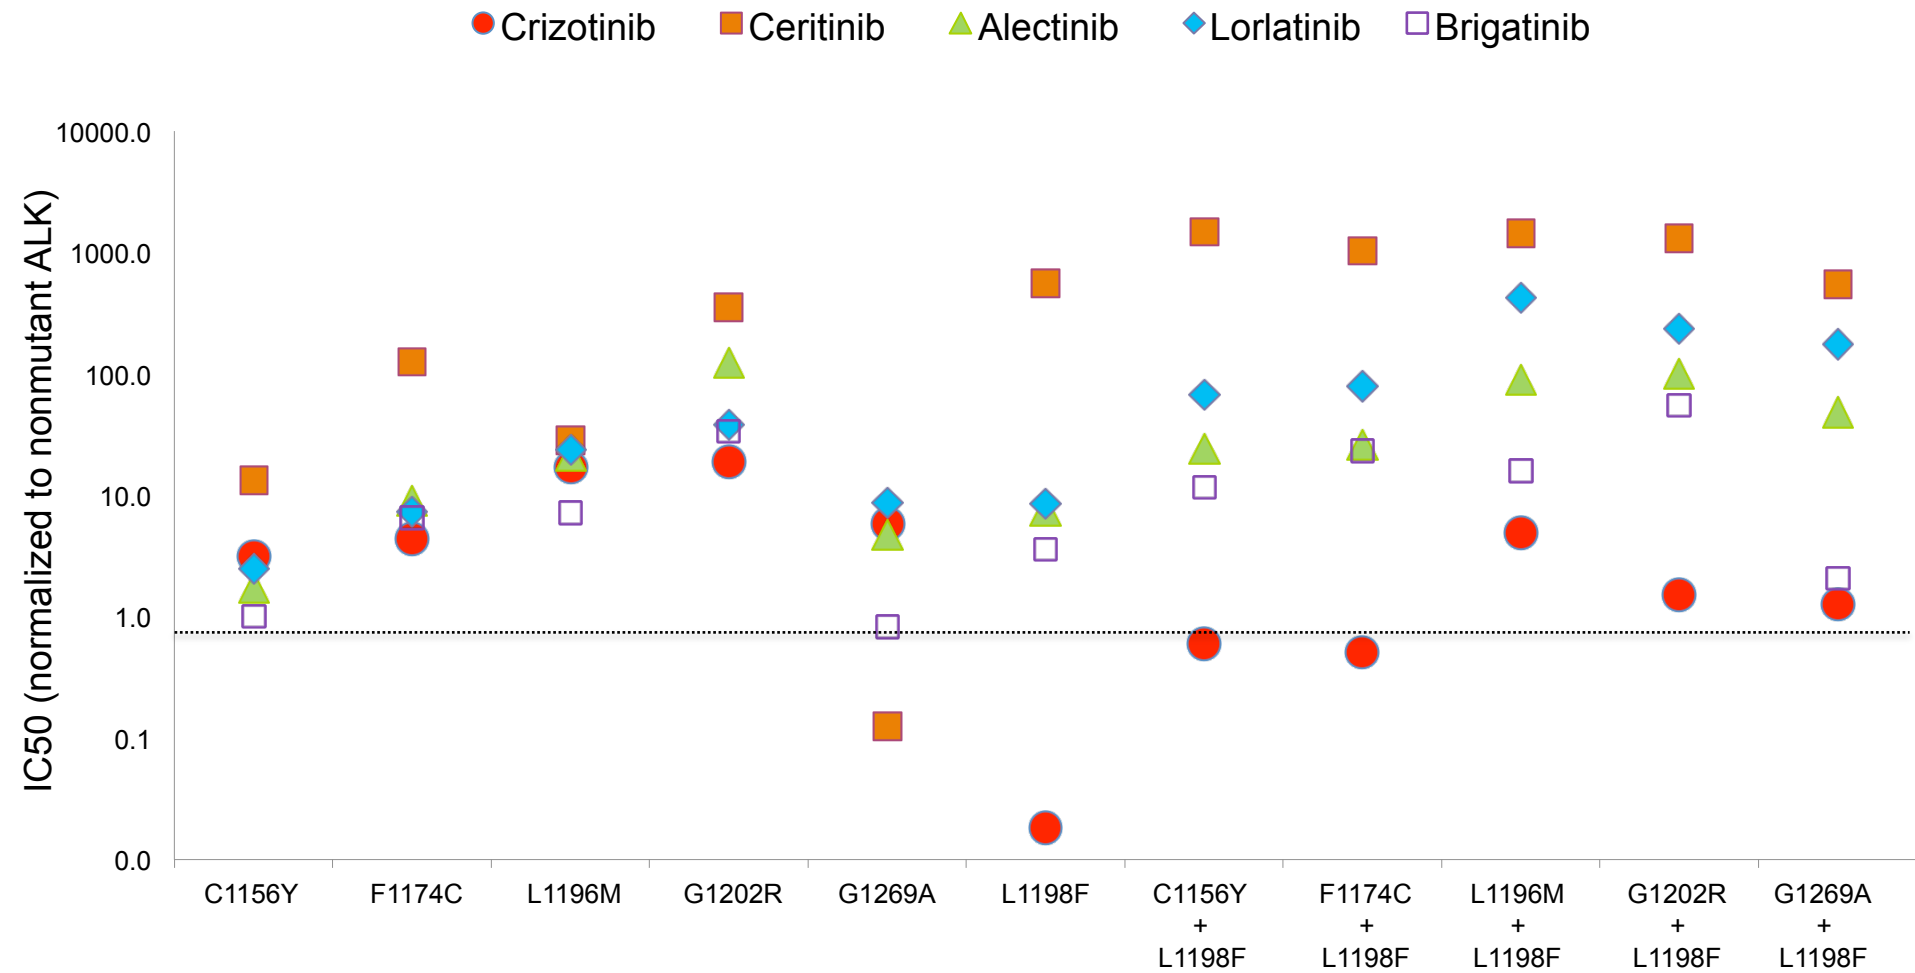

**Figure S4. Resensitization of Crizotinib-Resistant ALK Mutants by L1198F**

Ba/F3 cells were transformed by wildtype EML4-ALK or EML4-ALK harboring various ALK mutations, as indicated on the x-axis. Ba/F3 lines were treated with different ALK inhibitors for 48 hours. A CellTiter Glo assay (Promega) was then performed to determine relative cell numbers. IC50 values were calculated by concentration-response curve fitting utilizing a four-parameter analytical method. For each drug, the IC50 values for the mutant ALK-expressing Ba/F3 lines have been normalized to that of Ba/F3 cells expressing wildtype EML4-ALK. A normalized IC50 ratio of 1 (dashed line) indicates equivalent sensitivity to wildtype ALK. Ratios less than 1 indicate increased sensitivity, while ratios greater than 1 indicate decreased sensitivity relative to wildtype ALK.

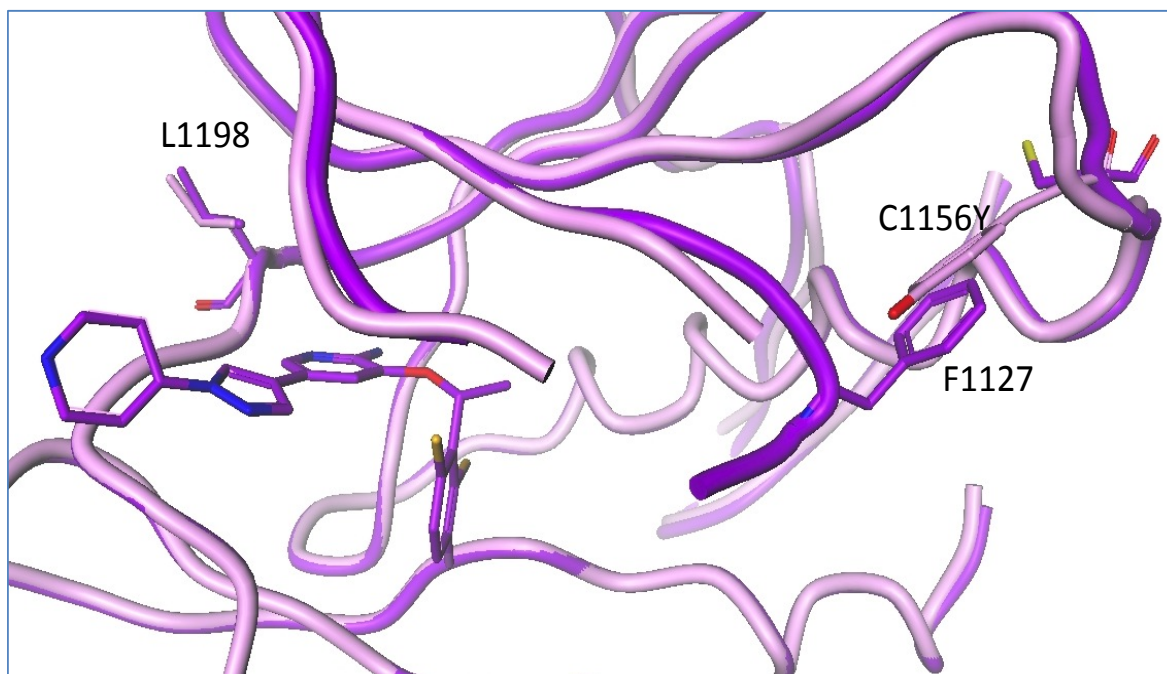

**Figure S5. Co-crystal structure of ALK C1156Y with Crizotinib**

Shown is an overlay of the co-crystal structures of wildtype ALK (purple) and ALK C1156Y (pink), both bound to crizotinib. The cysteine at position 1156 is remote (13 Å) from the inhibitor binding site, and substitution with tyrosine does not lead to steric interference with the inhibitor. The tyrosine side chain appears to cause the glycine-rich loop to be more dynamic, accelerating substrate on and product off and leading to greater catalytic efficiency, as demonstrated in Table S4. This increase in kinase activity likely underlies C1156Y-mediated resistance to crizotinib. More potent ALK inhibitors, however, may be able to overcome this mutant's increased kinase activity.

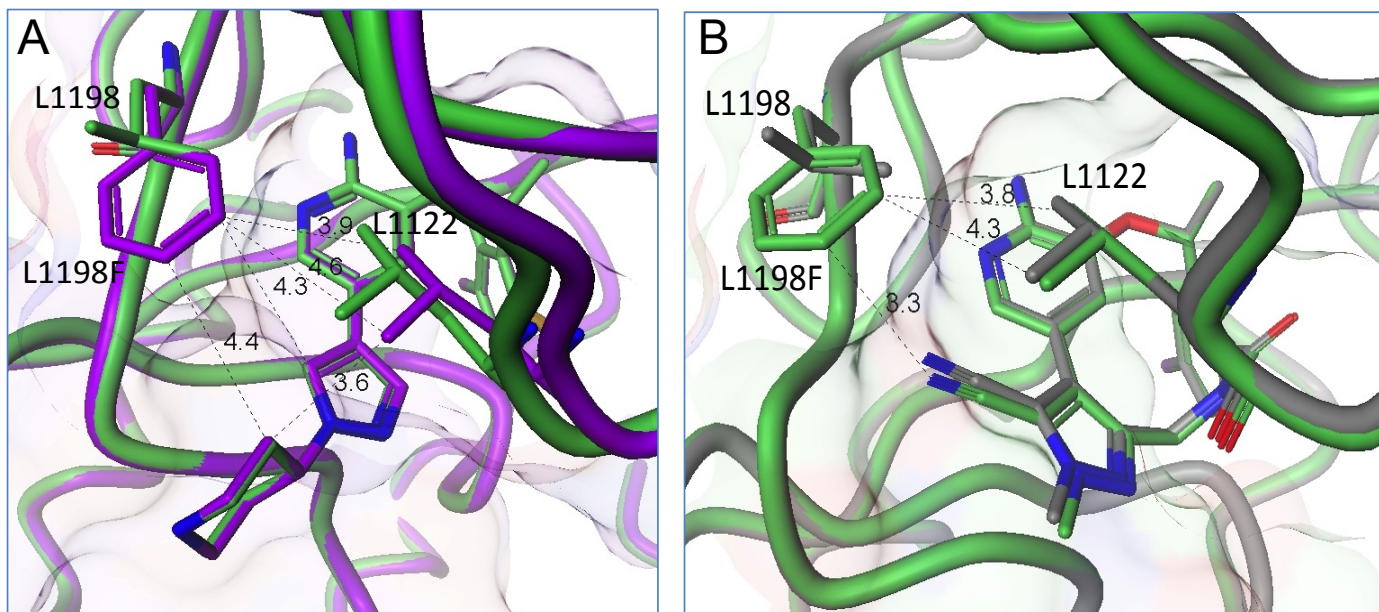

**Figure S6. Co-crystal structures of ALK C1156Y and C1156Y/L1198F with Crizotinib or Lorlatinib**

(A) Overlay of crizotinib bound to ALK C1156Y (green) and ALK C1156Y/L1198F (purple). In the double mutant, the phenylalanine moves slightly closer to crizotinib. The phenylalanine makes the environment more hydrophobic and contacts a leucine at position 1122 in the G loop above crizotinib. These alterations are energetically more favorable for crizotinib binding. (B) Overlay of lorlatinib bound to ALK C1156Y (gray) and ALK C1156Y/L1198F (green). In order for lorlatinib to bind the double mutant, the nitrile must move 0.4-0.5 Å away relative to its position when the native leucine resides at position 1198. The macrocyclic rigid-body rotation of lorlatinib is energetically unfavorable for binding. Distances are highlighted in angstroms.

Table S1. Cell Survival Assays of Ba/F3 Models Expressing ALK Resistant Mutants<sup>1</sup>

| Ba/F3 Model       | ALK Inhibitor | IC50, nM         | Normalized IC50 to ALK WT |
|-------------------|---------------|------------------|---------------------------|
| Parental          | crizotinib    | 960.2 ± 120.3    | 47.3                      |
| Parental          | lorlatinib    | 15038.5 ± 4902.5 | 8573.0                    |
| Parental          | ceritinib     | 824.0 ± 140.0    | 2346.7                    |
| Parental          | alectinib     | 880.0 ± 64.2     | 154.2                     |
| Parental          | brigatinib    | 2775.5 ± 443.5   | 719.8                     |
| ALK WT            | crizotinib    | 20.3 ± 4.4       | 1                         |
| ALK WT            | lorlatinib    | 1.8 ± 0.1        | 1                         |
| ALK WT            | ceritinib     | 0.4 ± 0.1        | 1                         |
| ALK WT            | alectinib     | 5.7 ± 1.3        | 1                         |
| ALK WT            | brigatinib    | 3.9 ± 0.4        | 1                         |
| ALK C1156Y        | crizotinib    | 63.7 ± 17.1      | 3.1                       |
| ALK C1156Y        | lorlatinib    | 4.4 ± 0.4        | 2.5                       |
| ALK C1156Y        | ceritinib     | 4.6 ± 2.0        | 13.2                      |
| ALK C1156Y        | alectinib     | 9.8 ± 3.6        | 1.7                       |
| ALK C1156Y        | brigatinib    | 3.9 ± 1.0        | 1.0                       |
| ALK L1198F        | crizotinib    | 0.4 ± 0.2        | 0.02                      |
| ALK L1198F        | lorlatinib    | 14.8 ± 2.7       | 8.4                       |
| ALK L1198F        | ceritinib     | 196.2 ± 13.9     | 558.9                     |
| ALK L1198F        | alectinib     | 42.3 ± 8.7       | 7.4                       |
| ALK L1198F        | brigatinib    | 13.9 ± 2.1       | 3.6                       |
| ALK C1156Y/L1198F | crizotinib    | 12.3 ± 1.4       | 0.6                       |
| ALK C1156Y/L1198F | lorlatinib    | 117.0 ± 11.7     | 66.7                      |
| ALK C1156Y/L1198F | ceritinib     | 524.0 ± 61.3     | 1492.6                    |
| ALK C1156Y/L1198F | alectinib     | 138.4 ± 31.9     | 24.2                      |
| ALK C1156Y/L1198F | brigatinib    | 44.6 ± 7.0       | 11.6                      |

<sup>1</sup>Ba/F3 cell lines expressing the indicated EML4-ALK mutants were treated with different ALK inhibitors for 48 hrs. Cell survival was assayed using a CellTiter-Glo assay. IC50 values were calculated by concentration-response curve fitting utilizing a four-parameter analytical method. Shown in the third column are mean IC50 values ± sem, and in the fourth column IC50 values normalized to that of Ba/F3 cells expressing wildtype EML4-ALK. WT, wildtype.

Table S2. Cell Survival Assays in Ba/F3 Models Expressing Different ALK L1198F Mutants<sup>1</sup>

| ALK           | Crizotinib   | Lorlatinib    | Ceritinib     | Alectinib     | Brigatinib   |
|---------------|--------------|---------------|---------------|---------------|--------------|
| WT            | 20.3 ± 4.4   | 1.8 ± 0.1     | 0.4 ± 0.1     | 5.7 ± 1.3     | 3.9 ± 0.4    |
| L1198F        | 0.4 ± 0.2    | 14.8 ± 2.7    | 196.2 ± 13.9  | 42.3 ± 8.7    | 13.9 ± 2.1   |
| C1156Y        | 63.7 ± 17.1  | 4.4 ± 0.4     | 4.63 ± 2.0    | 9.8 ± 3.6     | 3.9 ± 1.0    |
| C1156Y/L1198F | 12.3 ± 1.4   | 117.0 ± 11.7  | 524.0 ± 61.3  | 138.4 ± 31.9  | 44.6 ± 7.0   |
| F1174C        | 88.9 ± 17.9  | 12.9 ± 2.9    | 44.0 ± 11.2   | 52.0 ± 20.9   | 25.1 ± 8.7   |
| F1174C/L1198F | 10.4 ± 3.2   | 138.6 ± 31.1  | 364.5 ± 28.2  | 150.0 ± 34.4  | 89.2 ± 22.0  |
| L1196M        | 345.4 ± 35.7 | 41.7 ± 4.9    | 9.9 ± 1.8     | 120.4 ± 40.1  | 27.7 ± 9.0   |
| L1196M/L1198F | 100.2 ± 29.3 | 735.3 ± 139.4 | 504.0 ± 183.8 | 511.9 ± 137.7 | 61.8 ± 19.7  |
| G1202R        | 381.6 ± 72.0 | 67.0 ± 8.3    | 124.4 ± 21.1  | 706.6 ± 87.7  | 129.5 ± 51.6 |
| G1202R/L1198F | 30.8 ± 8.1   | 414.0 ± 92.8  | 455.6 ± 214.5 | 569.5 ± 237.1 | 211.8 ± 45.6 |
| G1269A        | 117.8 ± 2.0  | 15.2 ± 0.6    | 0.04 ± 0.01   | 27.0 ± 2.3    | 3.2 ± 0.2    |
| G1269A/L1198F | 25.9 ± 5.7   | 308.6 ± 60.2  | 192.0 ± 66.2  | 276.0 ± 58.4  | 8.1 ± 1.8    |

<sup>1</sup>Ba/F3 cell lines expressing the indicated EML4-ALK mutants were treated with different ALK inhibitors for 48 hrs. Cell survival was assayed using a CellTiter-Glo assay. IC50 values were calculated by concentration-response curve fitting utilizing a four-parameter analytical method. Shown are mean IC50 values ± sem. WT, wildtype.

Table S3. Inhibition Constants of ALK Inhibitors With Wildtype and Mutant ALK Kinase Domains<sup>1</sup>

| ALK Mutation  | ALK Inhibitor | Ki, nM        | Normalized Ki to ALK WT |
|---------------|---------------|---------------|-------------------------|
| WT            | crizotinib    | 1.6 ± 0.1     | 1                       |
| WT            | lorlatinib    | 0.14 ± 0.01   | 1                       |
| WT            | ceritinib     | 0.10 ± 0.01   | 1                       |
| WT            | alectinib     | 0.09 ± 0.01   | 1                       |
| WT            | AP26113       | 0.10 ± 0.01   | 1                       |
| C1156Y        | crizotinib    | 1.3 ± 0.1     | 0.80                    |
| C1156Y        | lorlatinib    | 0.08 ± 0.02   | 0.57                    |
| C1156Y        | ceritinib     | 0.054 ± 0.002 | 0.54                    |
| C1156Y        | alectinib     | 0.12 ± 0.01   | 1.3                     |
| C1156Y        | AP26113       | 0.11 ± 0.01   | 1.1                     |
| L1198F        | crizotinib    | 0.38 ± 0.01   | 0.24                    |
| L1198F        | lorlatinib    | 6.4 ± 0.1     | 46                      |
| L1198F        | ceritinib     | 19.4 ± 0.4    | 194                     |
| L1198F        | alectinib     | 3.3 ± 0.2     | 37                      |
| L1198F        | AP26113       | 4.2 ± 0.2     | 42                      |
| C1156Y/L1198F | crizotinib    | 0.88 ± 0.02   | 0.55                    |
| C1156Y/L1198F | lorlatinib    | 8.6 ± 2.9     | 61                      |
| C1156Y/L1198F | ceritinib     | 5.8 ± 0.2     | 58                      |
| C1156Y/L1198F | alectinib     | 6.1 ± 0.2     | 68                      |
| C1156Y/L1198F | AP26113       | 5.8 ± 0.1     | 58                      |

<sup>1</sup>Ki values were determined using microfluidic mobility shift assay as previously described for ALK and ROS assays (Johnson et al., 2014; Zou et al., 2015). The Ki's are mean values with standard error of the global fits to the Morrison equation for competitive inhibition, using multiple ATP concentrations and experimentally determined apparent ATP Km of 111, 77, 251 and 149 μM for wildtype (WT), C1156Y, L1198F and C1156Y/L1198F mutants, respectively.



Table S4. Kinetic Parameters of Wildtype and Mutant ALK Kinase Domains<sup>1</sup>

| ALK variant   | $k_{\text{cat}}$ ( $\text{s}^{-1}$ ) | $K_{\text{M,ATP}}$ ( $\mu\text{M}$ ) | $K_{\text{M,YFF}}$ ( $\mu\text{M}$ ) | Relative $k_{\text{cat}}/K_{\text{M,YFF}}$ |
|---------------|--------------------------------------|--------------------------------------|--------------------------------------|--------------------------------------------|
| WT            | $9.3 \pm 0.2$                        | $98 \pm 7$                           | $200 \pm 30$                         | 1                                          |
| C1156Y        | $22.4 \pm 1.5$                       | $89 \pm 9$                           | $85 \pm 16$                          | 5.6                                        |
| L1198F        | $3.4 \pm 0.1$                        | $96 \pm 15$                          | $193 \pm 26$                         | 0.4                                        |
| C1156Y/L1198F | $11.3 \pm 0.3$                       | $59 \pm 4$                           | $137 \pm 18$                         | 1.7                                        |

<sup>1</sup>Kinetic parameters were determined by a coupled spectrophotometric ATP-regenerating assay using a “YFF” analog of the ALK activation loop peptide, as described in Experimental Procedures. The values are best-fit values derived from the Michaelis-Menten equation for kinetic assays conducted at least in duplicate.

Table S5. Computational Models Comparing Wildtype ALK and ALK L1198F Binding to Crizotinib and Lorlatinib<sup>1</sup>

| Ligand     | $E_{L1198F} - E_{WT}$ (kcal) | Predicted $K_{d, L1198F}$ fold over $K_{d, WT}$ |
|------------|------------------------------|-------------------------------------------------|
| crizotinib | -0.82 ± 0.09                 | 0.25                                            |
| lorlatinib | +1.82 ± 0.08                 | 20                                              |

<sup>1</sup>FEP/REST (Schrödinger) modeling of crizotinib and lorlatinib bound to unphosphorylated ALK kinase domain, converting between wildtype and L1198F. Predicted ratios are derived from the energy difference between wildtype and ALK L1198F, with values less than one favoring binding to L1198F and values greater than one favoring binding to wildtype ALK.

Table S6. Energetics of Crizotinib and Lorlatinib Binding to Wildtype and Mutant ALK Kinase Domains<sup>1</sup>

| Variant           | Compound   | K <sub>d</sub><br>(nM) | K <sub>d,WT</sub> /<br>K <sub>d,mut</sub> | ΔG<br>(kcal mol <sup>-1</sup> ) | ΔG <sub>mut</sub> -ΔG <sub>WT</sub><br>(kcal mol <sup>-1</sup> ) | ΔH<br>(kcal mol <sup>-1</sup> ) | ΔH <sub>mut</sub> -ΔH <sub>WT</sub><br>(kcal mol <sup>-1</sup> ) |
|-------------------|------------|------------------------|-------------------------------------------|---------------------------------|------------------------------------------------------------------|---------------------------------|------------------------------------------------------------------|
| WT                | crizotinib | 5.0 ± 0.7              | 1                                         | -11.1                           | 0                                                                | -13.4 ± 1.4                     | 0                                                                |
|                   | lorlatinib | 0.38 ±<br>0.07         | 1                                         | -12.7                           | 0                                                                | -16.0 ± 0.5                     | 0                                                                |
| C1156Y            | crizotinib | 2.4 ± 0.8              | 0.48                                      | -11.6                           | -0.5                                                             | -13.1 ± 1.0                     | +0.3                                                             |
|                   | lorlatinib | ND                     | ND                                        | ND                              | ND                                                               | ND                              | ND                                                               |
| L1198F            | crizotinib | 1.4 ± 1.2              | 0.28                                      | -11.9                           | -0.8                                                             | -13.8 ± 1.8                     | -0.4                                                             |
|                   | lorlatinib | 7.7 ± 2.8              | 20                                        | -10.9                           | +1.8                                                             | -14.0 ± 2.2                     | +2.0                                                             |
| C1156Y/<br>L1198F | crizotinib | 2.0 ± 0.9              | 0.40                                      | -11.7                           | -0.6                                                             | -15.1 ± 1.1                     | -1.7                                                             |
|                   | lorlatinib | 7.9 ± 1.8              | 21                                        | -10.9                           | +1.8                                                             | -12.3 ± 0.3                     | +3.7                                                             |

<sup>1</sup>Energetic parameters were determined by isothermal titration calorimetry at 20 °C by direct monitoring of the enthalpy change (ΔH), for compound binding to the wildtype and mutant ALK kinase domains.

## REFERENCES

1. Li H, Durbin R. Fast and accurate short read alignment with Burrows-Wheeler transform. *Bioinformatics* 2009;25:1754-60.
2. Cibulskis K, Lawrence MS, Carter SL, et al. Sensitive detection of somatic point mutations in impure and heterogeneous cancer samples. *Nature biotechnology* 2013;31:213-9.
3. Fisher S, Barry A, Abreu J, et al. A scalable, fully automated process for construction of sequence-ready human exome targeted capture libraries. *Genome biology* 2011;12:R1.
4. Gnirke A, Melnikov A, Maguire J, et al. Solution hybrid selection with ultra-long oligonucleotides for massively parallel targeted sequencing. *Nature biotechnology* 2009;27:182-9.
5. Chapman MA, Lawrence MS, Keats JJ, et al. Initial genome sequencing and analysis of multiple myeloma. *Nature* 2011;471:467-72.
6. Lohr JG, Stojanov P, Lawrence MS, et al. Discovery and prioritization of somatic mutations in diffuse large B-cell lymphoma (DLBCL) by whole-exome sequencing. *Proceedings of the National Academy of Sciences of the United States of America* 2012;109:3879-84.
7. Ramos AH, Lichtenstein L, Gupta M, et al. Oncotator: cancer variant annotation tool. *Human mutation* 2015;36:E2423-9.
8. Carter SL, Cibulskis K, Helman E, et al. Absolute quantification of somatic DNA alterations in human cancer. *Nature biotechnology* 2012;30:413-21.
9. Landau DA, Carter SL, Stojanov P, et al. Evolution and impact of subclonal mutations in chronic lymphocytic leukemia. *Cell* 2013;152:714-26.
10. Escobar MD, West M. Bayesian Density Estimation and Inference Using Mixtures. *J Amer Statistical Assoc* 1995;90:577-88.
11. Lohr JG, Stojanov P, Carter SL, et al. Widespread genetic heterogeneity in multiple myeloma: implications for targeted therapy. *Cancer cell* 2014;25:91-101.
12. Friboulet L, Li N, Katayama R, et al. The ALK inhibitor ceritinib overcomes crizotinib resistance in non-small cell lung cancer. *Cancer discovery* 2014;4:662-73.
13. Johnson TW, Richardson PF, Bailey S, et al. Discovery of (10R)-7-amino-12-fluoro-2,10,16-trimethyl-15-oxo-10,15,16,17-tetrahydro-2H-8,4-(m etheno)pyrazolo[4,3-h][2,5,11]-benzoxadiazacyclotetradecine-3-carbonitrile (PF-06463922), a macrocyclic inhibitor of anaplastic lymphoma kinase (ALK) and c-ros oncogene 1 (ROS1) with preclinical brain exposure and broad-spectrum potency against ALK-resistant mutations. *Journal of medicinal chemistry* 2014;57:4720-44.
14. Zou HY, Li Q, Engstrom LD, et al. PF-06463922 is a potent and selective next-generation ROS1/ALK inhibitor capable of blocking crizotinib-resistant ROS1 mutations. *Proceedings of the National Academy of Sciences of the United States of America* 2015;112:3493-8.
15. Timofeevski SL, McTigue MA, Ryan K, et al. Enzymatic characterization of c-Met receptor tyrosine kinase oncogenic mutants and kinetic studies with aminopyridine and triazolopyrazine inhibitors. *Biochemistry* 2009;48:5339-49.
16. Donella-Deana A, Marin O, Cesaro L, et al. Unique substrate specificity of anaplastic lymphoma kinase (ALK): development of phosphoacceptor peptides for the assay of ALK activity. *Biochemistry* 2005;44:8533-42.
